# Supplementary material for: CLDN4 as a Novel Diagnostic and Prognostic Biomarker and Its Association with Immune Infiltrates in Ovarian Cancer
Source: Hindawi journal article supplement (doi:10.1155/2023/1075265), 2023-04-04

**A**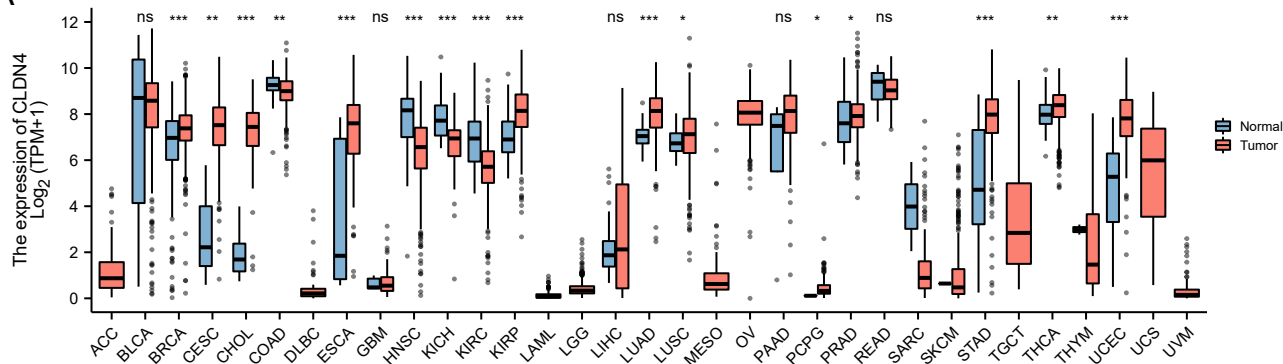**B**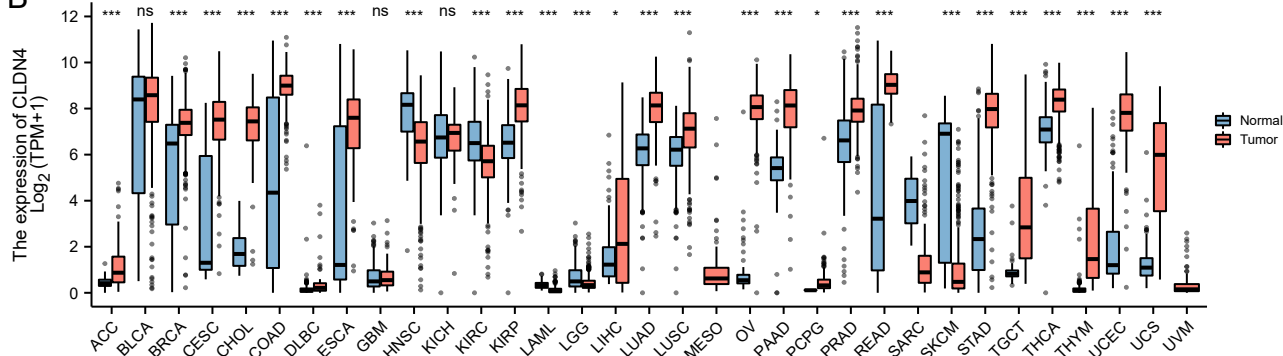

Supplement: f1 [file 1075265.f1.pdf]
